# Supplementary material for: Cobalt(ii)–curcumin cysteine conjugate as c-MYC promoter G-quadruplex selective switch-on fluorescence probe
Source: Royal Society of Chemistry journal article supplement (doi:10.1039/d2nj06193g), 2023-01-01
Supplement: d2nj06193g1.pdf [file d2nj06193g1.pdf]

## Cobalt(II)-curcumin cysteine conjugate as c-MYC promoter G-quadruplex selective switch-on fluorescence probe

Awadesh Dwivedi, and Niki Sweta Jha\*

Correspondence: Niki Sweta Jha, Department of Chemistry, National Institute of Technology

Patna, Ashok Rajpath, Patna- 800005; E-mail: [nikij@nitp.ac.in](mailto:nikij@nitp.ac.in)

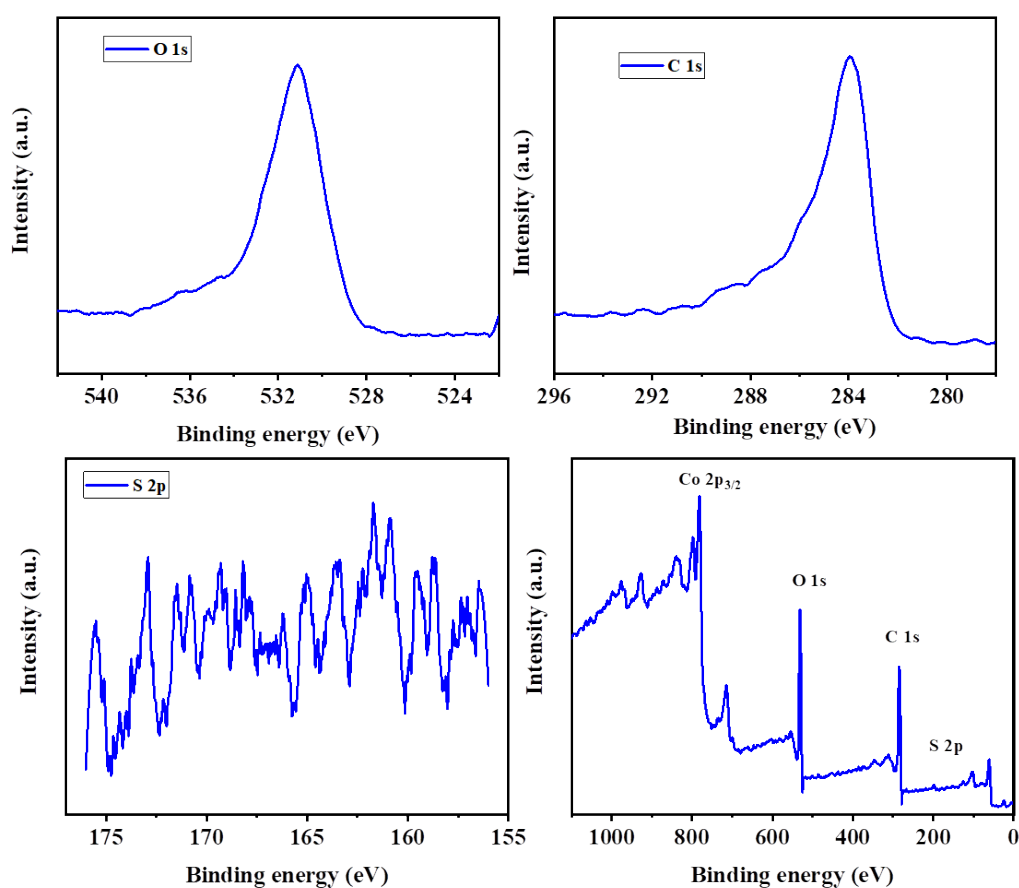

**Fig.S1.** XPS analysis of CO-CC (a) 528 – 536 eV (O1S), (b) 280 – 292 eV (C1s), (c) 155 – 170 eV (S2p), and (d) Co-CC conjugate.

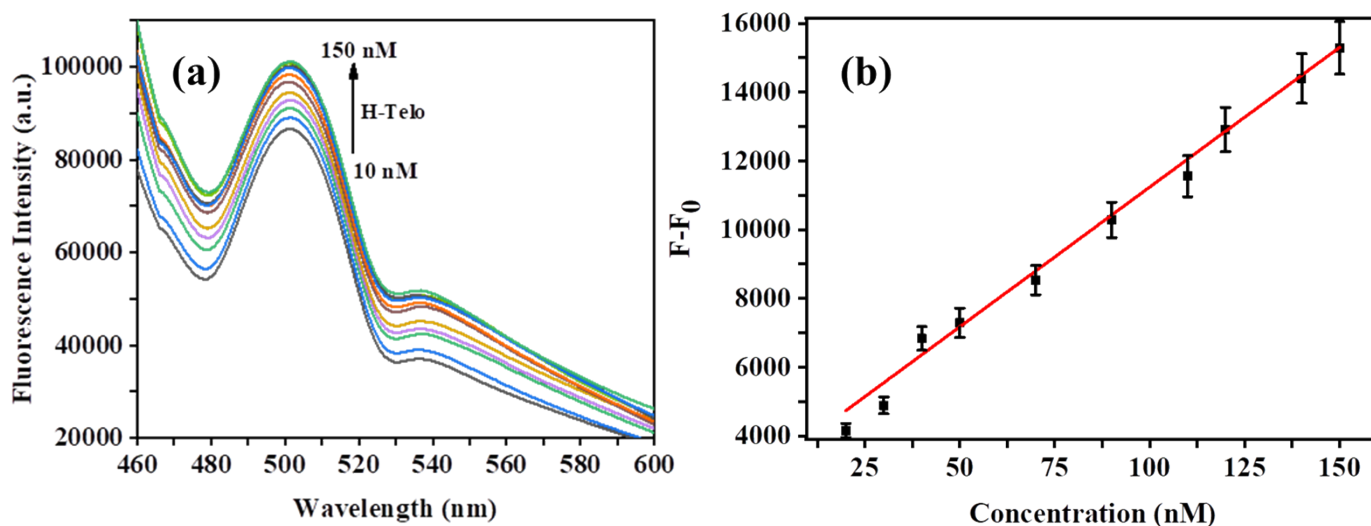

**Fig.S2.** (a) Fluorescence response of titration of probe Co-CC with increasing concentration of H-Telo in 10 mM Tris buffer with 100 mM KCl, pH 7.4. (b) Linear range of plot of  $F-F_0$  vs H-Telo DNA concentration (20 nM- 150 nM) with error bar

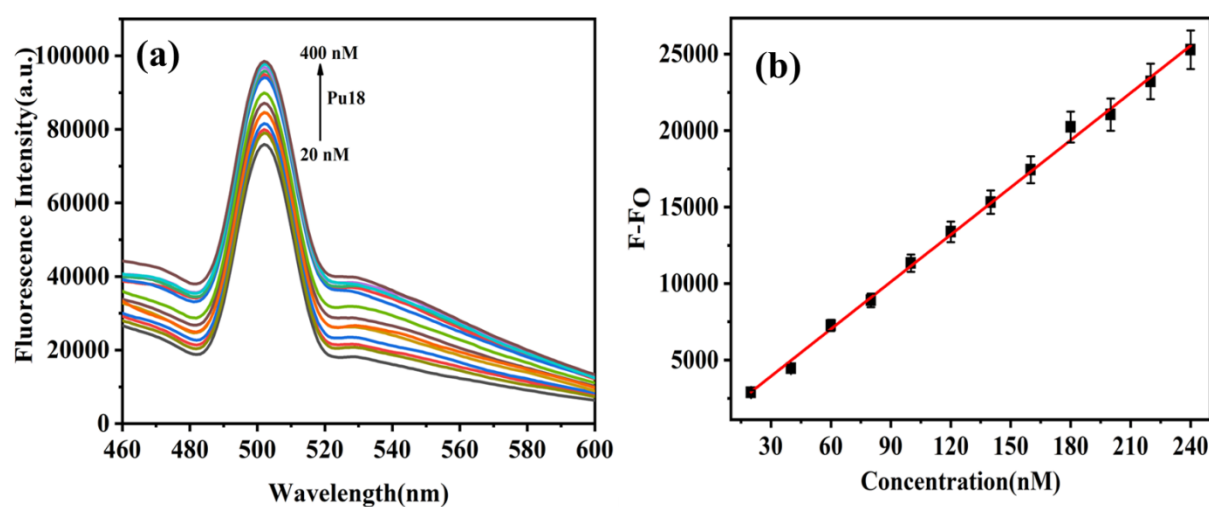

**Fig.S3.** (a) Fluorescence response of titration of probe Co-CC with increasing concentration of Pu18 in 10 mM Tris buffer with 100 mM KCl, pH 7.4. (b) Linear range of plot of  $F-F_0$  vs Pu18 DNA concentration (20 nM- 240 nM) with error bar.

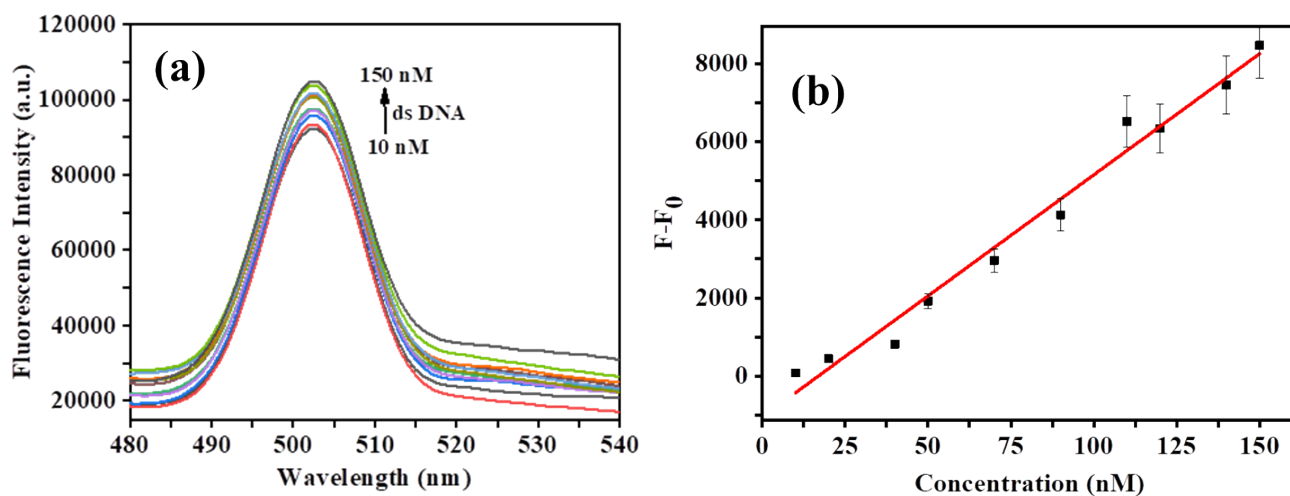

**Fig.S4.** (a) Fluorescence response of titration of probe Co-CC with increasing concentration of ds-DNA 10 mM phosphate buffer with 100 mM KCl, pH 7.4. (b) Linear range of plot of  $F-F_0$  vs ds-DNA (20 nM- 150 nM) concentration.

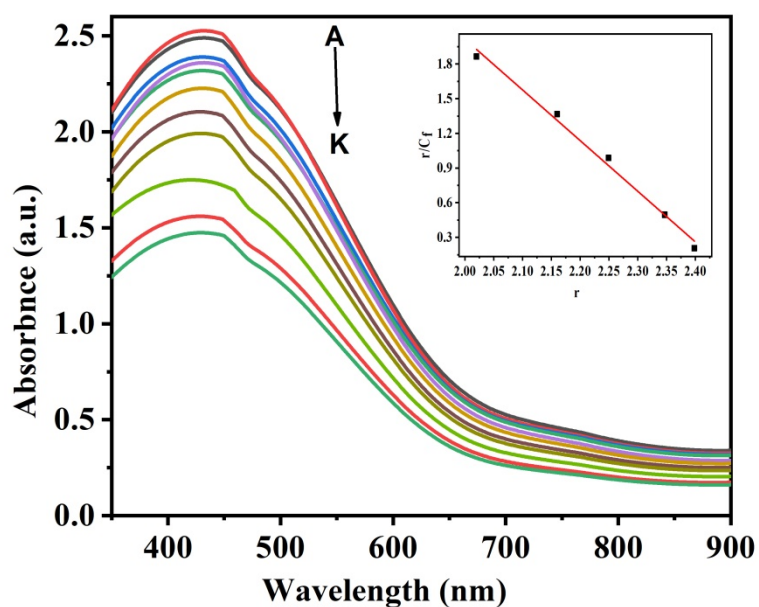

**Fig S5.** Absorption titration spectra of Co-CC with various concentration of ds DNA; inset scatchard plot of  $r/C_f$  vs  $r$ .
